# Supplementary material
Source: PubMed Central journal article supplement (PMC4423187)

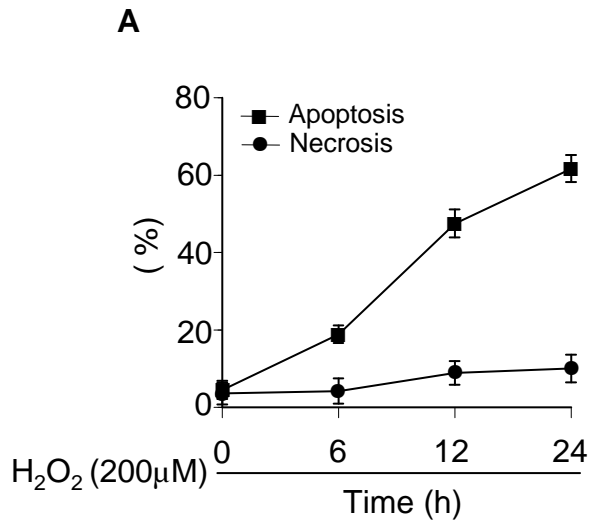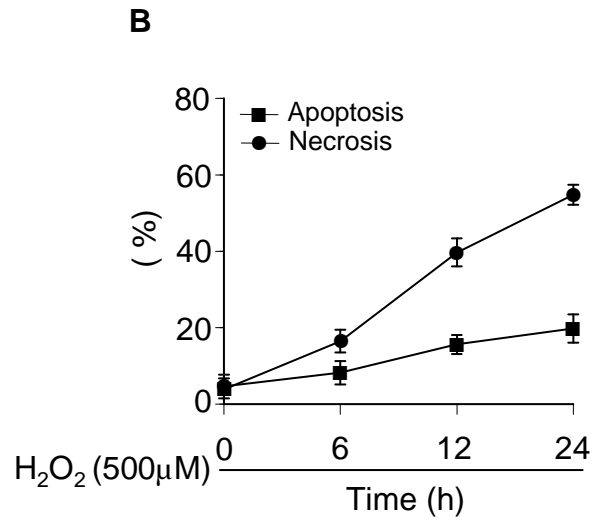

**A**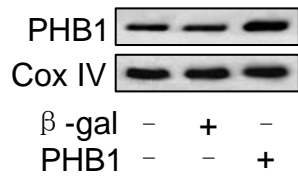**B**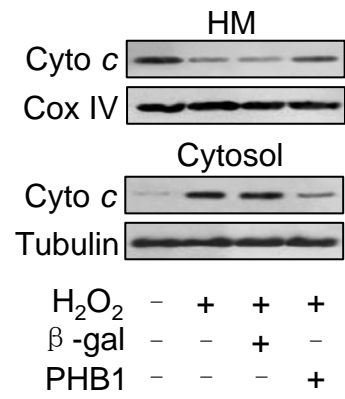

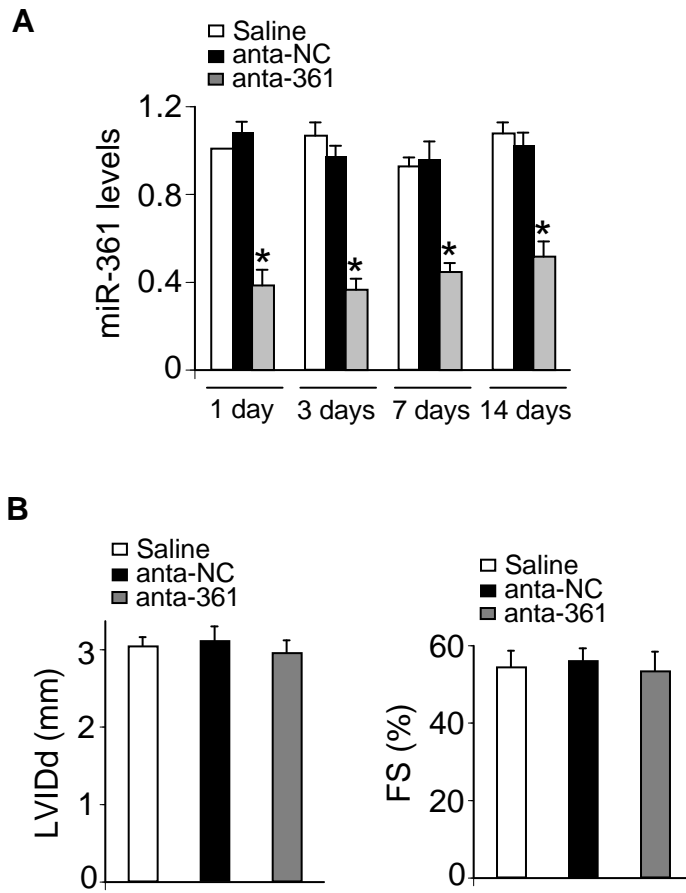

A

miR-361 Tg construct

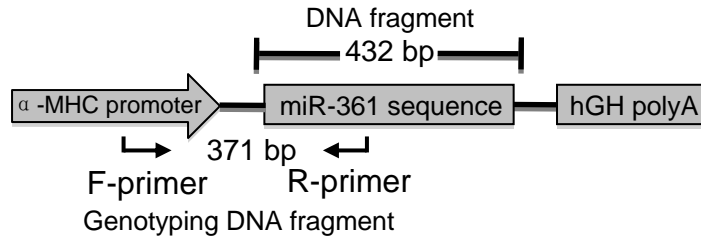

B

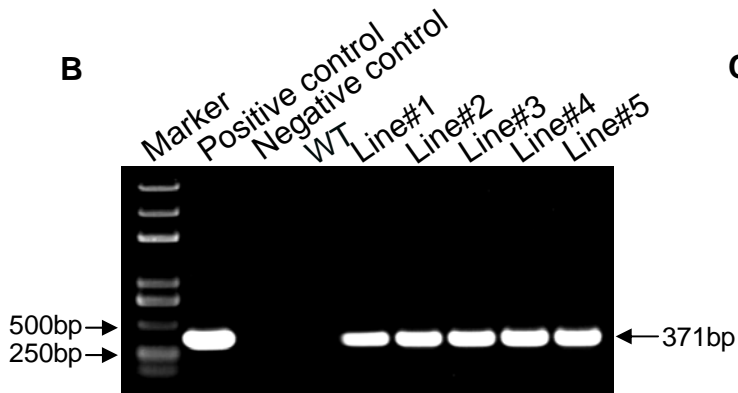

C

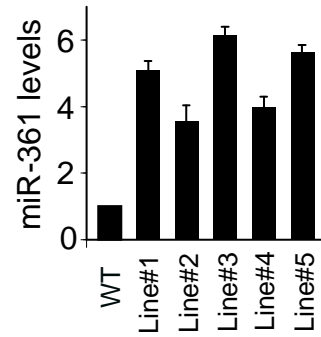

D

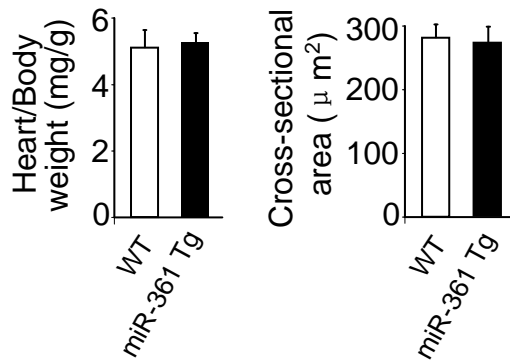

E

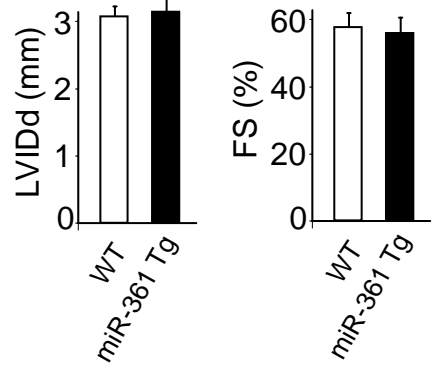

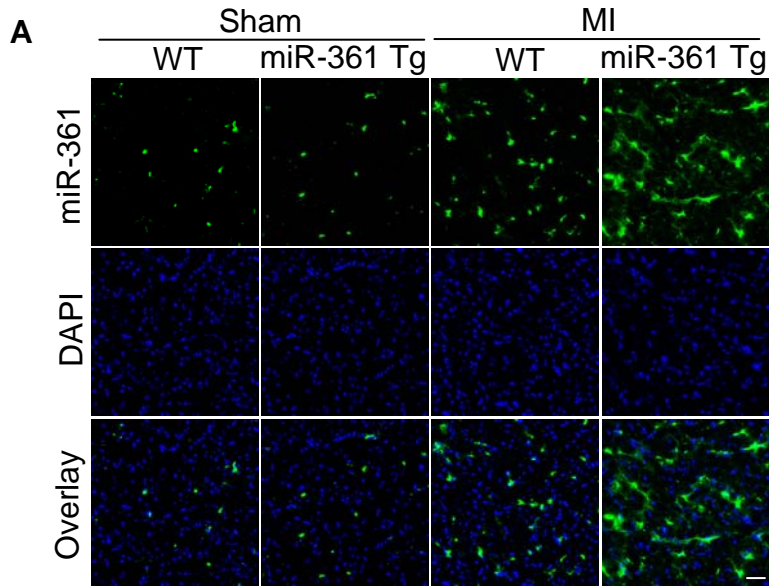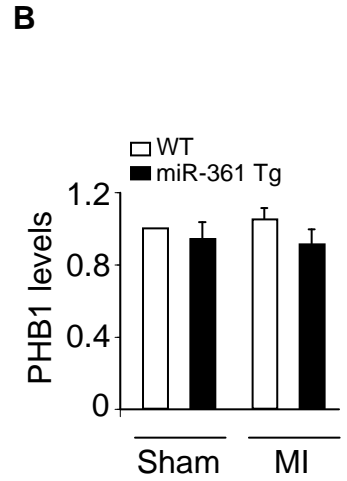

Supplement: cdd2014200x1.pdf [file cdd2014200x1.pdf]
